# Supplementary material
Source: Springer Nature journal article supplement (https://www.springermedizin.de/resource/supplementary/12936_2008_638_MOESM1_ESM.pdf/9547882)

M-form

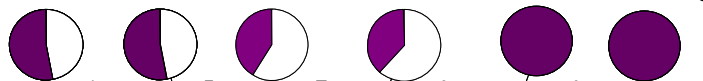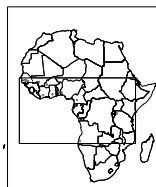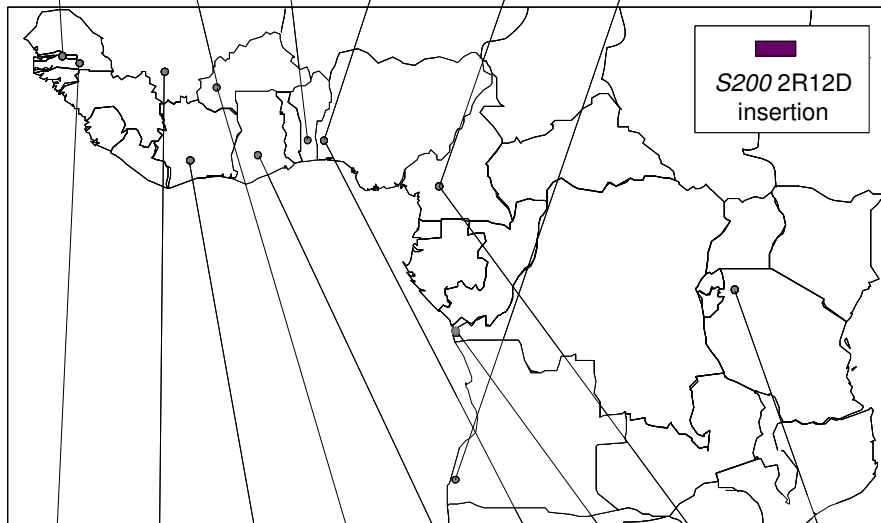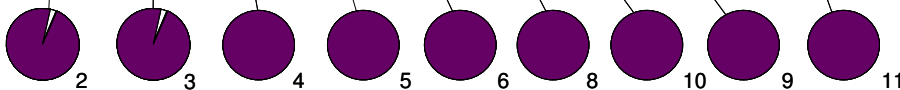

S-form

Supplement: MOESM1 [file 9547882]
